# Supplementary material
Source: PubMed Central journal article supplement (PMC6551659)
Supplement: ces-01-011-s01.pdf [file ces-01-011-s01.pdf]

**Supplemental Table S1: VDAC1-interacting proteins**

| Protein                                                                | Function                           | Cellular localization | Interaction assay              | Reference                |
|------------------------------------------------------------------------|------------------------------------|-----------------------|--------------------------------|--------------------------|
| <b>Apoptosis</b>                                                       |                                    |                       |                                |                          |
| <b>AIF1</b> -Apoptosis-inducing factor 1                               | Apoptosis                          | Mitochondria          | Affinity Capture-MS            | [1]                      |
| <b>Bak</b> -Bcl-2 homologous antagonist/killer                         | Apoptosis                          | Mitochondria          | Affinity Capture-Western       | [2, 3, 4]                |
| <b>Bax</b> -Bcl-2-associated X protein                                 | Apoptosis                          | Mitochondria          | Reconstituted Complex          | [5, 6, 7]                |
| <b>Bcl2</b> - B-cell lymphoma 2                                        | Apoptosis inhibitor                | Mitochondria          | Affinity Capture-Western       | [8, 9, 10, 11]           |
| <b>Bcl-xL</b> - B-cell lymphoma-extra large                            | Apoptosis inhibitor                | Mitochondria          | Western, Reconstituted Complex | [4, 5, 6, 12, 13, 14,15] |
| <b>Bim</b> - Bcl-2-like protein 11                                     | Apoptosis                          | Mitochondria          | Affinity Capture-Western       | [16, 17]                 |
| <b>BNIP3</b> -BCL2/adenovirus E1B 19 kDa protein-interacting protein 3 | Apoptosis                          | Mitochondria          | Biochemical Activity           | [18]                     |
| <b>Bop</b> - C22orf29                                                  | Apoptosis                          | Mitochondria          | Affinity Capture-Western       | [19]                     |
| <b>IκBα</b> - NF-kappa-B inhibitor alpha                               | Apoptosis inhibitor                | Cytosol, Mitochondria | Affinity Capture-Western       | [20]                     |
| <b>MCL1</b> - Induced myeloid leukemia differentiation protein         | Apoptosis                          | Mitochondria          | Reconstituted Complex          | [6]                      |
| <b>tBid</b> -BH3-interacting domain death agonist                      | Apoptosis                          | Mitochondria          | Reconstituted Complex          | [21]                     |
| <b>Apoptosis &amp; metabolism</b>                                      |                                    |                       |                                |                          |
| <b>Bag3</b> - Bcl2-associated athanogene 3                             | Metabolism/Apoptosis               | Mitochondria          | Affinity Capture-MS            | [22]                     |
| <b>HK-1</b> -Hexokinase-1                                              | Metabolism/Apoptosis inhibitor     | Cytosol               | Affinity Capture-Western       | [8, 9, 23, 24, 25]       |
| <b>HK-2</b> -Hexokinase-2                                              | Metabolism/Apoptosis inhibitor     | Cytosol               | Affinity Capture-Western       | [8, 9, 23]               |
| <b>Metabolism &amp; energy</b>                                         |                                    |                       |                                |                          |
| <b>ALDOA</b> -Fructose-biphosphate aldolase A                          | Metabolism/scaffolding protein     | Cytosol               | Reconstituted Complex          | [26]                     |
| <b>ANT</b> -ATP/ADP translocase                                        | Channel                            | Mitochondria          | Affinity Capture-Western       | [27, 28]                 |
| <b>CPT1a</b> -Carnitine O-palmitoyltransferase 1                       | Metabolism                         | Mitochondria          | Affinity Capture-Western       | [29]                     |
| <b>Cytochrome c</b>                                                    | Metabolism/Apoptosis               | Mitochondria          | Reconstituted Complex          | [30]                     |
| <b>GAPDH</b> -Glyceraldehyde-3-phosphate dehydrogenase                 | Metabolism                         | Cytosol               | Reconstituted Complex          | [31]                     |
| <b>GK</b> - Glycerol kinase                                            | Metabolism/Glycerol                |                       | Affinity Capture-Western       | [32]                     |
| <b>HAL</b> - Histidine ammonia-lyase                                   | Metabolism/L-histidine degradation | Cytosol               | Affinity Capture-MS            | [33]                     |
| <b>CKMT1A</b> -Creatine kinase U-type                                  | Metabolism                         | Mitochondria          | Reconstituted Complex, SRP     | [34, 35]                 |
| <b>STAR</b> -Steroidogenic acute regulatory proteins                   | Metabolism/cholesterol transport   | Mitochondria          | Affinity Capture-Western       | [36]                     |
| <b>TSPO</b> -Translocator protein                                      | Metabolism/cholesterol transport   | Mitochondria          | Affinity Capture-Western       | [37, 38]                 |
| <b>Transporters</b>                                                    |                                    |                       |                                |                          |
| <b>CYPD</b> -Cyclophilin D                                             | IMM permeability                   | Mitochondria          | Affinity Capture-Western       | [39]                     |
| <b>GLT-1</b> (Slc1a2)-Excitatory amino acid transporter 2              | Glutamate transporter              | Plasma membrane       | Affinity Capture-Western       | [40]                     |
| <b>MMGT1</b> -Membrane magnesium transporter 1                         | Mg <sup>2+</sup> transport         | ER-Golgi              | Affinity Capture-MS            | [1]                      |

|                                                              |                                                    |                                      |                                        |          |
|--------------------------------------------------------------|----------------------------------------------------|--------------------------------------|----------------------------------------|----------|
| <b>NXF1</b> - Nuclear RNA export factor 1                    | Export of mRNA                                     | Nucleus, cytosol                     | Affinity Capture-RNA                   | [41]     |
| <b>PLIN3</b> -Perilipin-3                                    | Transport of mannose 6 phosphate receptor to Golgi | Cytoplasm, Endosome membrane         | Affinity Capture-RNA                   | [33]     |
| <b>Mitochondria</b>                                          |                                                    |                                      |                                        |          |
| <b>ICT1</b> - Peptidyl-tRNA hydrolase                        | Peptidyl-tRNA hydrolase component                  | Mitochondria                         | Affinity Capture-MS                    | [42]     |
| <b>MAVS</b> -Mitochondrial antiviral-signaling protein       | Intracellular immune defense                       | Mitochondria, peroxisome             | Affinity Capture-Western               | [43]     |
| <b>MTX2</b> - Metaxin-2                                      | Transport                                          | Mitochondria                         | Affinity Capture-MS                    | [1]      |
| <b>RMDN3</b> - Regulator of microtubule dynamics protein 3   | Calcium homeostasis                                | Mitochondria outer membrane, Cytosol | Affinity Capture-MS                    | [1]      |
| <b>SPG7</b> -Paraplegin                                      | Protease                                           | Mitochondria                         | Affinity Capture-Western               | [44]     |
| <b>TOMM20</b> -Import receptor subunit TOM20 homolog         | Mitochondrial receptor                             | Mitochondria                         | Reconstituted Complex                  | [45]     |
| <b>Redox potential</b>                                       |                                                    |                                      |                                        |          |
| <b>eNOS</b> -Nitric oxide synthase, endothelial              | NO production                                      | Cytosol, Golgi, plasma membrane      | Affinity Capture-Western               | [46]     |
| <b>SOD1</b> -Superoxide dismutase                            | Antioxidant                                        | Cytosol, nucleus mitochondria        | Affinity Capture-Western               | [47]     |
| <b>TXNL1</b> -Thioredoxin-like protein 1                     | Redox reaction                                     | Cytosol                              | Two-hybrid                             | [48]     |
| <b>ER &amp; Golgi-associated</b>                             |                                                    |                                      |                                        |          |
| <b>GABAR-APL2</b> - GABAR-associated protein-like 2          | Transport                                          | ER-Golgi                             | Affinity Capture-MS                    | [49]     |
| <b>GOLT1B</b> - Vesicle transport protein GOT1B              | Glycosaminoglycan metabolism/transport             | ER-Golgi                             | Affinity Capture-MS                    | [1]      |
| <b>GRP78</b> -78 kDa glucose-regulated protein               | Protein folding                                    | ER                                   | Two-hybrid                             | [48]     |
| <b>PSENEN</b> - $\gamma$ -secretase subunit PEN-2            | Endoprotease                                       | ER-Golgi                             | Affinity Capture-MS                    | [50]     |
| <b>Kinases</b>                                               |                                                    |                                      |                                        |          |
| <b>CDK2</b> -Cyclin-dependent kinase 2                       | Kinase                                             | Cytosol                              | Affinity Capture-MS                    | [51]     |
| <b>CSNK2B</b> -Casein kinase II subunit $\beta$              | Kinase                                             | Cytosol, Nucleus                     | Two-hybrid                             | [52]     |
| <b>MAPK3</b> (ERK1)- Mitogen-activated kinase 3              | Kinase                                             | Cytosol                              | Affinity Capture-MS, FRET              | [53]     |
| <b>MPS1</b> - Dual specificity protein kinase TTK            | Kinase                                             | Cytosol                              | Affinity Capture-Western               | [54]     |
| <b>NEK1</b> - Serine/threonine-protein kinase                | Kinase                                             | Cytosol, Nucleus                     | Biochemical Activity                   | [55, 56] |
| <b>PANK2</b> -Pantothenate kinase 2                          | Kinase/CoA biosynthesis                            | Mitochondria                         | Affinity Capture-MS                    | [49]     |
| <b>PRKCE</b> - Protein kinase C $\epsilon$ type              | Kinase                                             | Cytosol                              | Western, Reconstituted Complex         | [57]     |
| <b>c-RAF</b> -Proto-oncogene serine/threonine-protein kinase | Kinase                                             | Cytosol                              | Affinity Capture-Western               | [58]     |
| <b>Cell receptors</b>                                        |                                                    |                                      |                                        |          |
| <b>ADRB2</b> - $\beta$ -2 adrenergic receptor                | Receptor                                           | Plasma Membrane                      | Protein fragment complementation assay | [59]     |
| <b>APOE</b> -Apolipoprotein E                                | Co-Receptor                                        | Plasma Membrane                      | Affinity Capture-MS                    | [35]     |
| <b>APP</b> - Amyloid beta A4 protein                         | Receptor                                           | Plasma Membrane                      | Affinity Capture-Western               | [60]     |

|                                                                           |                                  |                                |                                       |              |
|---------------------------------------------------------------------------|----------------------------------|--------------------------------|---------------------------------------|--------------|
| <b>CD4</b> -T-cell surface glycoprotein                                   | Receptor                         | Plasma Membrane                | Affinity Capture-MS                   | [61]         |
| <b>FGFR1OP2</b> - FGFR1 oncogene partner 2                                | Receptor/kinase                  | Plasma Membrane                | Affinity Capture-MS                   | [1]          |
| <b>IP3R</b> - Inositol trisphosphate receptor                             | Ca <sup>2+</sup> release channel | ER                             | Two-hybrid                            | [48, 62]     |
| <b>VCAM1</b> -Vascular cell adhesion protein 1                            |                                  | Membrane                       | Affinity Capture-MS                   | [63]         |
| <b>Vesicle proteins</b>                                                   |                                  |                                |                                       |              |
| <b>HTT</b> - Huntingtin                                                   | Transport, vesicle activity      | Cytosol, Nucleus               | Affinity Capture-MS                   | [1]          |
| <b>RAB2A, RAB5C, RAB7A</b> - Ras-related protein 2A, 5C, 7A               | Endo-lysosomal trafficking       | Cytoplasmic vesicles           | Affinity Capture-MS                   | [1]          |
| <b>TMED2</b> - Transmembrane emp24 domain-containing protein 2            | Receptor, vesicle coat formation | ER-Golgi, Cytosol              | Affinity Capture-MS                   | [1]          |
| <b>VAPA</b> -Vesicle-associated membrane protein-associated protein A     | Vesical                          | Membrane                       | Affinity Capture-MS, Co-fractionation | [1, 64, 65]  |
| <b>Structural</b>                                                         |                                  |                                |                                       |              |
| <b>ACTG</b> - Actin, cytoplasmic 2                                        | Cell motility                    | Cytosol                        | SPR                                   | [66, 67]     |
| <b>CAV1</b> -Caveolin-1                                                   | Cytoskeletal                     |                                | Affinity Capture-Western              | [68]         |
| <b>DYNLT1</b> -Dynein light chain Tctex-type 1                            | Motor protein                    | Cytosol                        | Two-hybrid, Reconstituted Complex     | [48, 69]     |
| <b>FLNB</b> -Filamin-B                                                    | Cytoskeletal                     | Cytosol                        | Two-hybrid                            | [48]         |
| <b>FMNL1</b> - Formin-like protein1                                       | Cytoskeletal                     | Cytosol                        | Affinity Capture-MS                   | [70]         |
| <b>GSN</b> -Gelsolin                                                      | Cytoskeletal                     | Cytosol                        | Affinity Capture-MS                   | [71]         |
| <b>HAUS3</b> -Augmin-like complex subunit 3                               | Cytoskeletal                     | Cytosol                        | Affinity Capture-MS                   | [72]         |
| <b>KIF5B</b> - Kinesin-1 heavy chain                                      | Microtubule-associated           |                                | Affinity Capture-MS                   | [49]         |
| <b>MAP2</b> -Microtubule-associated protein 2                             | Cytoskeletal                     | Cytosol                        | Affinity Capture-MS                   | [73]         |
| <b>MYO19</b> - Unconventional myosin-XIX                                  | Cytoskeletal                     | Cytosol                        | Affinity Capture-MS                   | [1]          |
| <b>SCIN</b> -Adseverin                                                    | Cytoskeletal                     | Cytosol                        | Two-hybrid                            | [74]         |
| <b>TUBA1B</b> -Tubulin alpha-1B chain                                     | Cytoskeletal                     | Cytosol                        | Affinity Capture-Western, PLB         | [75, 76, 77] |
| <b>Ubiquitination</b>                                                     |                                  |                                |                                       |              |
| <b>ASB14, ASB17</b> -Ankyrin repeat and SOCS box protein 14, 17           | Ubiquitination                   | Cytosol, Nucleus               | Affinity Capture-MS                   | [78]         |
| <b>FOXRED2</b> - FAD-dependent oxidoreductase domain-containing protein 2 | Ubiquitination                   | ER                             | Affinity Capture-MS                   | [79]         |
| <b>PARK2</b> - E3 ubiquitin-protein ligase Parkin                         | Ubiquitination                   | Cytosol, Mitochondria          |                                       | [80-83]      |
| <b>UBAC2</b> - Ubiquitin-associated domain-containing protein 2           | Restricts protein trafficking    | ER                             | Affinity Capture-MS                   | [79]         |
| <b>UBC</b> -Ubiquitin C                                                   | Ubiquitination                   | Cytosol, Nucleus               | Affinity Capture-MS                   | [84-87]      |
| <b>DNA-associated</b>                                                     |                                  |                                |                                       |              |
| <b>ATF2</b> - Cyclic AMP-dependent transcription factor                   | Transcriptional activator        | Cytosol, nucleus, mitochondria | Affinity Capture-Western              | [24]         |
| <b>HDAC5</b> -Histone deacetylase 5                                       | Histone deacetylase              | Nucleus                        | Affinity Capture-MS                   | [88]         |

|                                                                       |                                                        |                                     |                                      |          |
|-----------------------------------------------------------------------|--------------------------------------------------------|-------------------------------------|--------------------------------------|----------|
| <b>MCC</b> - Colorectal mutant cancer protein                         | Inhibits DNA binding of $\beta$ -catenin/ TCF/ LEF TFs | Nucleus                             | Affinity Capture-MS                  | [49]     |
| <b>MDC1</b> - Mediator of DNA damage checkpoint protein 1             | DNA damage check point protein                         | Nucleus                             | Affinity Capture-MS                  | [89]     |
| <b>MED20</b> - Mediator of RNA polymerase II transcription subunit 20 | RNA polymerase II transcription mediator               | Nucleus                             | Affinity Capture-MS                  | [90]     |
| <b>SIRT7</b> -NAD-dependent protein deacetylase sirtuin-7             | Deacetylase                                            | Nucleus                             | Affinity Capture-MS                  | [91]     |
| <b>SPRTN</b> - SprT-like domain-containing protein Spartan            | Regulator of UV-induced DNA damage                     | Cytosol, nucleus                    | Affinity Capture-MS                  | [92]     |
| <b>ZNF622</b> -Zinc finger protein 622                                | Transcription activation                               | Nucleus, cytosol                    | Two-hybrid                           | [48]     |
| <b>RNA-associated</b>                                                 |                                                        |                                     |                                      |          |
| <b>A1837181</b>                                                       | Poly(A) RNA binding                                    |                                     | Affinity Capture-MS                  | [72, 93] |
| <b>EWSR1</b> - RNA-binding protein EWS                                | Transcriptional repressor                              | Cytosol, nucleus, membrane          | Proximity labeled-MS                 | [93]     |
| <b>MOV10</b> - Putative helicase                                      | RNA helicase                                           | Cytosol                             | Affinity Capture-MS                  | [41]     |
| <b>NTRK1</b> - High affinity nerve growth factor receptor             | Receptor tyrosine kinase                               | Membrane                            | Affinity Capture-MS                  | [94]     |
| <b>Chaperons</b>                                                      |                                                        |                                     |                                      |          |
| <b>CRYAB</b> - $\alpha$ -crystallin B                                 | Chaperone-like activity                                | Cytosol, nucleus                    | Affinity Capture-MS                  | [95]     |
| <b>DNAJB1</b> -DnaJ homolog subfamily B1                              | Chaperone                                              | Cytosol, nucleus                    | Two-hybrid                           | [48]     |
| <b>GRP75/HSPA9</b> - Stress-70 protein                                | Chaperone                                              | Mitochondria, nucleus               | Affinity Capture-Western, Two-hybrid | [48]     |
| <b>SUMO4</b> -Small ubiquitin-related modifier 4                      | Protein stability                                      | Nucleus                             | Affinity Capture-MS                  | [96]     |
| <b>TBCC</b> - Tubulin-specific chaperone C                            | Protein folding chaperone                              | Cytosol                             | Two-hybrid                           | [48]     |
| <b>TTC1</b> - Tetratricopeptide repeat protein 1                      | Protein folding                                        | Cytosol                             | Two-hybrid                           | [48]     |
| <b>Others</b>                                                         |                                                        |                                     |                                      |          |
| <b>A<math>\beta</math></b> -Amyloid $\beta$                           | Peptide                                                | Plasma Membrane                     | SPR, MST,PLB                         | [60, 97] |
| <b>DCD</b> - Dermcidin                                                | Anti-microbial activity                                | Secreted                            | Affinity Capture-MS                  | [49]     |
| <b>ENV</b> -Envelope glycoprotein gp160                               | Virion structural                                      | Host membrane, virion membrane      | Affinity Capture-MS                  | [98]     |
| <b>KLHL40</b> -Kelch-like protein 40                                  | Muscle development                                     | Cytosol                             | Two-hybrid                           | [99]     |
| <b>Kringle 5</b> - K5 plasminogen domain                              | Angiogenic inhibitor                                   | Secreted                            | BiFC, Affinity Capture-Western       | [3, 4]   |
| <b>PPM1G</b> - Protein phosphatase 1G                                 | Serine/threonine Phosphatase                           | Membrane, cytosol                   | Two-hybrid                           | [48]     |
| <b>SNCA</b> - $\alpha$ -synuclein                                     | Dopamine release                                       | Cytosol, nucleus membrane, secreted | Affinity Capture-Western             | [100]    |
| <b>TMEM109</b> - Transmembrane protein 109                            | UVC protection                                         | ER, nucleus                         | Affinity Capture-MS                  | [1]      |
| <b>TRAF6</b> - TNF receptor-associated factor 6                       | Activation of NF-kappa-B and JUN                       | Cytosol                             | Affinity Capture-MS                  | [49]     |
| <b>VWA9</b> - von Willebrand factor A domain-containing protein 9     | Unknown                                                | Cytosol, nucleus                    | Affinity Capture-MS                  | [1]      |
| <b>14-3-3-epsilon</b> /YWHAE                                          | Adaptor protein                                        | Cytosol, melanomasol                | Affinity Capture-Western             | [101]    |
| <b>ZG16B</b> - Zymogen granule protein 16 homolog B                   | Carbohydrate binding                                   | Secreted                            | Affinity Capture-MS                  | [33]     |

## Supplemental References

1. Hein MY, Hubner NC, Poser I, Cox J, Nagaraj N, Toyoda Y, Gak IA, Weisswange I, Mansfeld J, Buchholz F, Hyman AA, Mann M (2015). A human interactome in three quantitative dimensions organized by stoichiometries and abundances. *Cell* 163(3): 712-723. doi: 10.1016/j.cell.2015.09.053
2. Tajeddine N, Galluzzi L, Kepp O, Hangen E, Morselli E, Senovilla L, Araujo N, Pinna G, Larochette N, Zamzami N, Modjtahedi N, Harel-Bellan A, Kroemer G (2008). Hierarchical involvement of Bak, VDAC1 and Bax in cisplatin-induced cell death. *Oncogene* 27(30): 4221-4232. doi: 10.1038/onc.2008.63
3. Li L, Yao YC, Gu XQ, Che D, Ma CQ, Dai ZY, Li C, Zhou T, Cai WB, Yang ZH, Yang X, Gao GQ (2014). Plasminogen kringle 5 induces endothelial cell apoptosis by triggering a voltage-dependent anion channel 1 (VDAC1) positive feedback loop. *J Biol Chem* 289(47): 32628-32638. doi: 10.1074/jbc.M114.567792
4. Gu X, Yao Y, Cheng R, Zhang Y, Dai Z, Wan G, Yang Z, Cai W, Gao G, Yang X (2011). Plasminogen K5 activates mitochondrial apoptosis pathway in endothelial cells by regulating Bak and Bcl-x(L) subcellular distribution. *Apoptosis* 16(8): 846-855. doi: 10.1007/s10495-011-0618-9
5. Shi Y, Chen J, Weng C, Chen R, Zheng Y, Chen Q, Tang H (2003). Identification of the protein-protein contact site and interaction mode of human VDAC1 with Bcl-2 family proteins. *Biochem Biophys Res Commun* 305(4): 989-996. doi: 10.1016/S0006-291X(03)00871-4
6. Weng C, Li Y, Xu D, Shi Y, Tang H (2005). Specific cleavage of Mcl-1 by caspase-3 in tumor necrosis factor-related apoptosis-inducing ligand (TRAIL)-induced apoptosis in Jurkat leukemia T cells. *J Biol Chem* 280(11): 10491-500. doi: 10.1074/jbc.M412819200
7. Narita M, Shimizu S, Ito T, Chittenden T, Lutz RJ, Matsuda H, Tsujimoto Y (1998). Bax interacts with the permeability transition pore to induce permeability transition and cytochrome c release in isolated mitochondria. *Proc Natl Acad Sci U S A* 95(25): 14681-14686. doi: 10.1073/pnas.95.25.14681
8. Geula S, Ben-Hail D, Shoshan-Barmatz V (2012). Structure-based analysis of VDAC1: N-terminus location, translocation, channel gating and association with anti-apoptotic proteins. *Biochem J* 444(3): 475-485. doi: 10.1042/BJ20112079
9. Abu-Hamad S, Arbel N, Calo D, Arzoine L, Israelson A, Keinan N, Ben-Romano R, Friedman O, Shoshan-Barmatz V (2009). The VDAC1 N-terminus is essential both for apoptosis and the protective effect of anti-apoptotic proteins. *J Cell Sci* 122(Pt 11): 1906-1916. doi: 10.1242/jcs.040188
10. Arbel N, Shoshan-Barmatz V (2010). Voltage-dependent anion channel 1-based peptides interact with Bcl-2 to prevent antiapoptotic activity. *J Biol Chem* 285(9): 6053-6062. doi: 10.1074/jbc.M109.082990
11. Rong YP, Bultynck G, Aromolaran AS, Zhong F, Parys JB, De Smedt H, Mignery GA, Roderick HL, Bootman MD, Distelhorst CW (2009). The BH4 domain of Bcl-2 inhibits ER calcium release and apoptosis by binding the regulatory and coupling domain of the IP3 receptor. *Proc Natl Acad Sci U S A* 106(34): 14397-14402. doi: 10.1073/pnas.0907555106
12. Shimizu S, Narita M, Tsujimoto Y (1999). Bcl-2 family proteins regulate the release of apoptogenic cytochrome c by the mitochondrial channel VDAC. *Nature* 399(6735): 483-487. doi: 10.1038/20959
13. Shimizu S, Konishi A, Kodama T, Tsujimoto Y (2000). BH4 domain of antiapoptotic Bcl-2 family members closes voltage-dependent anion channel and inhibits apoptotic mitochondrial changes and cell death. *Proc Natl Acad Sci U S A* 97(7): 3100-3105. doi: 10.1073/pnas.97.7.3100
14. Ramanathan A, Schreiber SL (2009). Direct control of mitochondrial function by mTOR. *Proc Natl Acad Sci U S A* 106(52): 22229-22232. doi: 10.1073/pnas.0912074106
15. Huang H, Hu X, Eno CO, Zhao G, Li C, White C (2013). An interaction between Bcl-xL and the voltage-dependent anion channel (VDAC) promotes mitochondrial Ca<sup>2+</sup> uptake. *J Biol Chem* 288(27): 19870-19881. doi: 10.1074/jbc.M112.448290
16. Sugiyama T, Shimizu S, Matsuoka Y, Yoneda Y, Tsujimoto Y (2002). Activation of mitochondrial voltage-dependent anion channel by pro-apoptotic BH3-only protein Bim. *Oncogene* 21(32): 4944-4956. doi: 10.1038/sj.onc.1205621
17. Gao Z, Shang Q, Liu Z, Deng C, Guo C (2015). Mitochondrial ATF2 translocation contributes to apoptosis induction and BRAF inhibitor resistance in melanoma through the interaction of Bim with VDAC1. *Oncotarget* 6(34): 36338-36353. doi: 10.18632/oncotarget.5537
18. Brahimi-Horn MC, Lacas-Gervais S, Adaixo R, Ilc K, Rouleau M, Notte A, Dieu M, Michiels C, Voeltzel T, Maguer-Satta V, Pelletier J, Ilie M, Hofman P, Manoury B, Schmidt A, Hiller S, Pouyssegur J, Mazure NM (2015). Local mitochondrial-endolysosomal microfusion cleaves voltage-dependent anion channel 1 to promote survival in hypoxia. *Mol Cell Biol* 35(9): 1491-1505. doi: 10.1128/MCB.01402-14
19. Zhang X, Weng C, Li Y, Wang X, Jiang C, Li X, Xu Y, Chen Q, Pan L, Tang H (2012). Human Bop is a novel BH3-only member of the Bcl-2 protein family. *Protein Cell* 3(10): 790-801. doi: 10.1007/s13238-012-2069-7
19. Pazarentzos E, Mahul-Mellier AL, Datler C, Chaisaklert W, Hwang MS, Kroon J, Qize D, Osborne F, Al-Rubaish A, Al-Ali A, Mazarakis ND, Aboagye EO, Grimm S (2014). IκappaBetaalpha inhibits apoptosis at the outer mitochondrial membrane independently of NF-κappaB retention. *EMBO J* 33(23): 2814-2828. doi: 10.15252/embj.201488183
20. Rostovtseva TK, Antonsson B, Suzuki M, Youle RJ, Colombini M, Bezrukov SM (2004). Bid, but not Bax, regulates VDAC channels. *J Biol Chem* 279(14): 13583-13575. doi: 10.1074/jbc.M310593200

21. Chen Y, Yang LN, Cheng L, Tu S, Guo SJ, Le HY, Xiong Q, Mo R, Li CY, Jeong JS, Jiang L, Blackshaw S, Bi LJ, Zhu H, Tao SC, Ge F (2013). Bcl2-associated athanogene 3 interactome analysis reveals a new role in modulating proteasome activity. **Mol Cell Proteomics** 12(10): 2804-2819. doi: 10.1074/mcp.M112.025882
22. Arzoine L, Zilberberg N, Ben-Romano R, Shoshan-Barmatz V (2009). Voltage-dependent anion channel 1-based peptides interact with hexokinase to prevent its anti-apoptotic activity. **J Biol Chem** 284(6): 3946-3955. doi: 10.1074/jbc.M803614200
23. Arzoine L, Zilberberg N, Ben-Romano R, Shoshan-Barmatz V (2009). Voltage-dependent anion channel 1-based peptides interact with hexokinase to prevent its anti-apoptotic activity. **J Biol Chem** 284(6): 3946-3955. doi: 10.1074/jbc.M803614200
24. Lau E, Kluger H, Varsano T, Lee K, Scheffler I, Rimm DL, Ideker T, Ronai ZA (2012). PKCepsilon promotes oncogenic functions of ATF2 in the nucleus while blocking its apoptotic function at mitochondria. **Cell** 148(3): 543-555. doi: 10.1016/j.cell.2012.01.016
25. Blachly-Dyson E, Zambronicz EB, Yu WH, Adams V, McCabe ER, Adelman J, Colombini M, Forte M (1993). Cloning and functional expression in yeast of two human isoforms of the outer mitochondrial membrane channel, the voltage-dependent anion channel. **J Biol Chem** 268(3): 1835-1841. PMID: 8420959
26. Shoshan-Barmatz V, Israelson A (2005). The voltage-dependent anion channel in endoplasmic/sarcoplasmic reticulum: characterization, modulation and possible function. **J Membr Biol** 204(2): 57-66. doi: 10.1007/s00232-005-0749-4
27. Marzo I, Brenner C, Zamzami N, Susin SA, Beutner G, Brdiczka D, Remy R, Xie ZH, Reed JC, Kroemer G (1998). The permeability transition pore complex: a target for apoptosis regulation by caspases and bcl-2-related proteins. **J Exp Med** 187(8): 1261-1271. doi: 10.1084/jem.187.8.1261
28. Allouche M, Pertuiset C, Robert JL, Martel C, Veneziano R, Henry C, dein OS, Saint N, Brenner C, Chopineau J (2012). ANT-VDAC1 interaction is direct and depends on ANT isoform conformation in vitro. **Biochem Biophys Res Commun** 429(1-2): 12-17. doi: 10.1016/j.bbrc.2012.10.108
29. Lee K, Kerner J, Hoppel CL (2011). Mitochondrial carnitine palmitoyltransferase 1a (CPT1a) is part of an outer membrane fatty acid transfer complex. **J Biol Chem** 286(29): 25655-62. doi: 10.1074/jbc.M111.228692
30. Vyssokikh MY, Zorova L, Zorov D, Heimlich G, Jurgensmeier JJ, Brdiczka D (2002). Bax releases cytochrome c preferentially from a complex between porin and adenine nucleotide translocator. Hexokinase activity suppresses this effect. **Mol Biol Rep** 29(1-2): 93-96. PMID: 12243190
31. Tarze A, Deniaud A, Le Bras M, Maillier E, Molle D, Larochette N, Zamzami N, Jan G, Kroemer G, Brenner C (2007). GAPDH, a novel regulator of the pro-apoptotic mitochondrial membrane permeabilization. **Oncogene** 26(18): 2606-2620. doi: 10.1038/sj.onc.1210074
32. Adams V, Griffin L, Towbin J, Gelb B, Worley K, McCabe ER (1991). Porin interaction with hexokinase and glycerol kinase: metabolic microcompartmentation at the outer mitochondrial membrane. **Biochem Med Metab Biol** 45(3): 271-291. doi: 10.1016/0885-4505(91)90032-G
33. Huttlin EL, Ting L, Bruckner RJ, Gebreab F, Gygi MP, Szpyt J, Tam S, Zarraga G, Colby G, Baltier K, Dong R, Guarani V, Vaites LP, Ordureau A, Rad R, Erickson BK, Wuhr M, Chick J, Zhai B, Kolippakkam D, Mintseris J, Obar RA, Harris T, Artavanis-Tsakonas S, Sowa ME, De Camilli P, Paulo JA, Harper JW, Gygi SP (2015). The BioPlex Network: A Systematic Exploration of the Human Interactome. **Cell** 162(2): 425-440. doi: 10.1016/j.cell.2015.06.043
34. Schlattner U, Dolder M, Wallimann T, Tokarska-Schlattner M (2001). Mitochondrial creatine kinase and mitochondrial outer membrane porin show a direct interaction that is modulated by calcium. **J Biol Chem** 276(51): 48027-48030. doi: 10.1074/jbc.M106524200
35. Brdiczka D, Kaldis P, Wallimann T (1994). In vitro complex formation between the octamer of mitochondrial creatine kinase and porin. **J Biol Chem** 269(44): 27640-27644. PMID: 7525559
36. Bose M, Whittal RM, Miller WL, Bose HS (2008). Steroidogenic activity of StAR requires contact with mitochondrial VDAC1 and phosphate carrier protein. **J Biol Chem** 283(14): 8837-8845. doi: 10.1074/jbc.M709221200
37. Veenman L, Papadopoulos V, Gavish M (2007). Channel-like functions of the 18-kDa translocator protein (TSPO): regulation of apoptosis and steroidogenesis as part of the host-defense response. **Curr Pharm Des** 13(23): 2385-2405. doi: 10.2174/138161207781368710
38. Gatliff J, East D, Crosby J, Abeti R, Harvey R, Craigen W, Parker P, Campanella M (2014). TSPO interacts with VDAC1 and triggers a ROS-mediated inhibition of mitochondrial quality control. **Autophagy** 10(12): 2279-2296. doi: 10.4161/15548627.2014.991665
39. Crompton M, Virji S, Ward JM (1998). Cyclophilin-D binds strongly to complexes of the voltage-dependent anion channel and the adenine nucleotide translocase to form the permeability transition pore. **Eur J Biochem** 258(2): 729-735. doi: 10.1046/j.1432-1327.1998.2580729.x
40. Jackson JG, O'Donnell JC, Krizman E, Robinson MB (2015). Displacing hexokinase from mitochondrial voltage-dependent anion channel impairs GLT-1-mediated glutamate uptake but does not disrupt interactions between GLT-1 and mitochondrial proteins. **J Neurosci Res** 93(7): 999-1008. doi: 10.1002/jnr.23533
41. Castello A, Fischer B, Eichelbaum K, Horos R, Beckmann BM, Strein C, Davey NE, Humphreys DT, Preiss T, Steinmetz LM, Krijgsveld J, Hentze MW (2012). Insights into RNA biology from an atlas of mammalian mRNA-binding proteins. **Cell** 149(6): 1393-1406. doi: 10.1016/j.cell.2012.04.031

42. Richter R, Rorbach J, Pajak A, Smith PM, Wessels HJ, Huynen MA, Smeitink JA, Lightowlers RN, Chrzanowska-Lightowlers ZM (2010). A functional peptidyl-tRNA hydrolase, ICT1, has been recruited into the human mitochondrial ribosome. **EMBO J** 29(6): 1116-1125. doi: 10.1038/emboj.2010.14
43. Guan K, Zheng Z, Song T, He X, Xu C, Zhang Y, Ma S, Wang Y, Xu Q, Cao Y, Li J, Yang X, Ge X, Wei C, Zhong H (2013). MAVS regulates apoptotic cell death by decreasing K48-linked ubiquitination of voltage-dependent anion channel 1. **Mol Cell Biol** 33(16): 3137-3149. doi: 10.1128/MCB.00030-13
44. Fu F, Wu D, Qian C (2016). The MicroRNA-24 Inhibitor Prevents Neuronal Apoptosis via Targeting Spastic Paraplegia 7 After Cerebral Ischemia. **J Mol Neurosci** 59(3): 421-429. doi: 10.1007/s12031-016-0769-9
45. Schleiff E, Shore GC, Goping IS (1997). Human mitochondrial import receptor, Tom20p. Use of glutathione to reveal specific interactions between Tom20-glutathione S-transferase and mitochondrial precursor proteins. **FEBS Lett** 404(2-3): 314-318. doi: 10.1016/S0014-5793(97)00145-2
46. Alvira CM, Umesh A, Husted C, Ying L, Hou Y, Lyu SC, Nowak J, Cornfield DN (2012). Voltage-dependent anion channel-2 interaction with nitric oxide synthase enhances pulmonary artery endothelial cell nitric oxide production. **Am J Respir Cell Mol Biol** 47(5): 669-678. doi: 10.1165/rcmb.2011-0436OC
47. Israelson A, Arbel N, Da Cruz S, Ilieva H, Yamanaka K, Shoshan-Barmatz V, Cleveland DW (2010). Misfolded mutant SOD1 directly inhibits VDAC1 conductance in a mouse model of inherited ALS. **Neuron** 67(4): 575-587. doi: 10.1016/j.neuron.2010.07.019
48. Szabadkai G, Bianchi K, Varnai P, De Stefani D, Wieckowski MR, Cavagna D, Nagy AI, Balla T, Rizzuto R (2006). Chaperone-mediated coupling of endoplasmic reticulum and mitochondrial Ca<sup>2+</sup> channels. **J Cell Biol** 175(6): 901-911. doi: 10.1083/jcb.200608073
49. Ewing RM, Chu P, Elisma F, Li H, Taylor P, Climie S, McBroom-Cerajewski L, Robinson MD, O'Connor L, Li M, Taylor R, Dharsee M, Ho Y, Heilbut A, Moore L, Zhang S, Ornatsky O, Bukhman YV, Ethier M, Sheng Y, Vasilescu J, Abu-Farha M, Lambert JP, Duetzel HS, Stewart II, Kuehl B, Hogue K, Colwill K, Gladwish K, Muskat B, et al. (2007). Large-scale mapping of human protein-protein interactions by mass spectrometry. **Mol Syst Biol** 3:89. doi: 10.1038/msb4100134
50. Hur JY, Teranishi Y, Kihara T, Yamamoto NG, Inoue M, Hosia W, Hashimoto M, Winblad B, Frykman S, Tjernberg LO (2012). Identification of novel gamma-secretase-associated proteins in detergent-resistant membranes from brain. **J Biol Chem** 287(15): 11991-12005. doi: 10.1074/jbc.M111.246074
51. Neganova I, Vilella F, Atkinson SP, Lloret M, Passos JF, von Zglinicki T, O'Connor JE, Burks D, Jones R, Armstrong L, Lako M (2011). An important role for CDK2 in G1 to S checkpoint activation and DNA damage response in human embryonic stem cells. **Stem Cells** 29(4): 651-9. doi: 10.1002/stem.620
52. Vinayagam A, Stelzl U, Foulle R, Plassmann S, Zenkner M, Timm J, Assmus HE, Andrade-Navarro MA, Wanker EE (2011). A directed protein interaction network for investigating intracellular signal transduction. **Sci Signal** 4(189): rs8. doi: 10.1126/scisignal.2001699
53. Galli S, Jahn O, Hitt R, Hesse D, Opitz L, Plessmann U, Urlaub H, Poderoso JJ, Jares-Erijman EA, Jovin TM (2009). A new paradigm for MAPK: structural interactions of hERK1 with mitochondria in HeLa cells. **PLoS One** 4(10): e7541. doi: 10.1371/journal.pone.0007541
54. Zhang X, Ling Y, Guo Y, Bai Y, Shi X, Gong F, Tan P, Zhang Y, Wei C, He X, Ramirez A, Liu X, Cao C, Zhong H, Xu Q, Ma RZ (2016). Mps1 kinase regulates tumor cell viability via its novel role in mitochondria. **Cell Death Dis** 7(7): e2292. doi: 10.1038/cddis.2016.193
55. Chen Y, Craigen WJ, Riley DJ (2009). Nek1 regulates cell death and mitochondrial membrane permeability through phosphorylation of VDAC1. **Cell Cycle** 8(2): 257-67. doi: 10.4161/cc.8.2.7551
56. Chen Y, Gaczynska M, Osmulski P, Polci R, Riley DJ (2010). Phosphorylation by Nek1 regulates opening and closing of voltage dependent anion channel 1. **Biochem Biophys Res Commun** 394(3): 798-803. doi: 10.1016/j.bbrc.2010.03.077
57. Baines CP, Song CX, Zheng YT, Wang GW, Zhang J, Wang OL, Guo Y, Bolli R, Cardwell EM, Ping P (2003). Protein kinase Cepsilon interacts with and inhibits the permeability transition pore in cardiac mitochondria. **Circ Res** 92(8): 873-880. doi: 10.1161/01.RES.0000069215.36389.8D
58. Le Mellay V, Troppmaier J, Benz R, Rapp UR (2002). Negative regulation of mitochondrial VDAC channels by C-Raf kinase. **BMC Cell Biol** 3:14. doi: 10.1186/1471-2121-3-
59. Kittanakom S, Barrios-Rodiles M, Petschnigg J, Arnoldo A, Wong V, Kotlyar M, Heisler LE, Jurisica I, Wrana JL, Nislow C, Stagljar I (2014). CHIP-MYTH: a novel interactive proteomics method for the assessment of agonist-dependent interactions of the human beta(2)-adrenergic receptor. **Biochem Biophys Res Commun** 445(4): 746-756. doi: 10.1016/j.bbrc.2014.02.033
60. Fernandez-Echevarria C, Diaz M, Ferrer I, Canerina-Amaro A, Marin R (2014). Abeta promotes VDAC1 channel dephosphorylation in neuronal lipid rafts. Relevance to the mechanisms of neurotoxicity in Alzheimer's disease. **Neuroscience** 278: 354-366. doi: 10.1016/j.neuroscience.2014.07.079
61. Bernhard OK, Cunningham AL, Sheil MM (2004). Analysis of proteins copurifying with the CD4/lck complex using one-dimensional polyacrylamide gel electrophoresis and mass spectrometry: comparison with affinity-tag based protein detection and evaluation of different solubilization methods. **J Am Soc Mass Spectrom** 15(4): 558-567. doi: 10.1016/j.jasms.2003.12.006



62. Gincel D, Zaid H, Shoshan-Barmatz V (2001). Calcium binding and translocation by the voltage-dependent anion channel: a possible regulatory mechanism in mitochondrial function. **Biochem J** 358(Pt 1): 147-155. doi: 10.1042/0264-6021:3580147
63. Humphries JD, Byron A, Bass MD, Craig SE, Pinney JW, Knight D, Humphries MJ (2009). Proteomic analysis of integrin-associated complexes identifies RCC2 as a dual regulator of Rac1 and Arf6. **Sci Signal** 2(87): ra51. doi: 10.1126/scisignal.20.00396
64. Havugimana PC, Hart GT, Nepusz T, Yang H, Turinsky AL, Li Z, Wang PI, Boutz DR, Fong V, Phanse S, Babu M, Craig SA, Hu P, Wan C, Vlasblom J, Dar VU, Bezginov A, Clark GW, Wu GC, Wodak SJ, Tillier ER, Paccanaro A, Marcotte EM, Emili A (2012). A census of human soluble protein complexes. **Cell** 150(5): 1068-1081. doi: 10.1016/j.cell.2012.08.011
65. Wan C, Borgeson B, Phanse S, Tu F, Drew K, Clark G, Xiong X, Kagan O, Kwan J, Bezginov A, Chessman K, Pal S, Cromar G, Papoulas O, Ni Z, Boutz DR, Stoilova S, Havugimana PC, Guo X, Maly RH, Sarov M, Greenblatt J, Babu M, Derry WB, Tillier ER, Wallingford JB, Parkinson J, Marcotte EM, Emili A (2015). Panorama of ancient metazoan macromolecular complexes. **Nature** 525(7569): 339-344. doi: 10.1038/nature14877
66. Roman I, Figys J, Steurs G, Zizi M (2006). Direct measurement of VDAC-actin interaction by surface plasmon resonance. **Biochim Biophys Acta** 1758(4): 479-486. doi: 10.1016/j.bbamem.2006.03.019
67. Xu X, Forbes JG, Colombini M (2001). Actin modulates the gating of *Neurospora crassa* VDAC. **J Membr Biol** 180(1): 73-81. doi: 10.1007/s002320010060
68. Ramirez CM, Gonzalez M, Diaz M, Alonso R, Ferrer I, Santpere G, Puig B, Meyer G, Marin R (2009). VDAC and ERalpha interaction in caveolae from human cortex is altered in Alzheimer's disease. **Mol Cell Neurosci** 42(3): 172-183. doi: 10.1016/j.mcn.2009.07.001
69. Schwarzer C, Barnikol-Watanabe S, Thinnies FP, Hilschmann N (2002). Voltage-dependent anion-selective channel (VDAC) interacts with the dynein light chain Tctex1 and the heat-shock protein PBP74. **Int J Biochem Cell Biol** 34(9): 1059-1070. doi: 10.1016/s1357-2725(02)00026-2
70. Han Y, Yu G, Sarioglu H, Caballero-Martinez A, Schlott F, Ueffing M, Haase H, Peschel C, Krackhardt AM (2013). Proteomic investigation of the interactome of FMNL1 in hematopoietic cells unveils a role in calcium-dependent membrane plasticity. **J Proteomics** 78:72-82. doi: 10.1016/j.jprot.2012.11.015
71. Kusano H, Shimizu S, Koya RC, Fujita H, Kamada S, Kuzumaki N, Tsujimoto Y (2000). Human gelsolin prevents apoptosis by inhibiting apoptotic mitochondrial changes via closing VDAC. **Oncogene** 19(42): 4807-4814. doi: 10.1038/sj.onc.1203868
72. Hutchins JR, Toyoda Y, Hegemann B, Poser I, Heriche JK, Sykora MM, Augsburg M, Hudecz O, Buschhorn BA, Bulkescher J, Conrad C, Comartin D, Schleiffer A, Sarov M, Pozniakovskiy A, Slabicki MM, Schloissnig S, Steinmacher I, Leuschner M, Szykor A, Lawo S, Pelletier L, Stark H, Nasmyth K, Ellenberg J, Durbin R, Buchholz F, Mechtler K, Hyman AA, Peters JM (2010). Systematic analysis of human protein complexes identifies chromosome segregation proteins. **Science** 328(5978): 593-599. doi: 10.1126/science.1181348
73. Lindén M, Karlsson G (1996). Identification of Porin as a Binding Site for MAP2. **Biochemical and Biophysical Research Communications** 218(3): 833-836. doi: 10.1006/bbrc.1996.0148
74. Miura N, Takemori N, Kikugawa T, Tanji N, Higashiyama S, Yokoyama M (2012). Adseverin: a novel cisplatin-resistant marker in the human bladder cancer cell line HT1376 identified by quantitative proteomic analysis. **Mol Oncol** 6(3): 311-322. doi: 10.1016/j.molonc.2011.12.002
75. Carre M, Andre N, Carles G, Borghi H, Brichese L, Briand C, Braguer D (2002). Tubulin is an inherent component of mitochondrial membranes that interacts with the voltage-dependent anion channel. **J Biol Chem** 277(37): 33664-33669. doi: 10.1074/jbc.M203834200
76. Maldonado EN, Patnaik J, Mullins MR, Lemasters JJ (2010). Free tubulin modulates mitochondrial membrane potential in cancer cells. **Cancer Res** 70(24): 10192-10201. doi: 10.1158/0008-5472.CAN-10-2429
77. Koppenol WH, Bounds PL, Dang CV (2011). Otto Warburg's contributions to current concepts of cancer metabolism. **Nat Rev Cancer** 11(5): 325-337. doi: 10.1038/nrc3038
78. Andresen CA, Smedegaard S, Sylvestersen KB, Svensson C, Iglesias-Gato D, Cazzamali G, Nielsen TK, Nielsen ML, Flores-Morales A (2014). Protein interaction screening for the ankyrin repeats and suppressor of cytokine signaling (SOCS) box (ASB) family identify Asb11 as a novel endoplasmic reticulum resident ubiquitin ligase. **J Biol Chem** 289(4): 2043-2054. doi: 10.1074/jbc.M113.534602
79. Christianson JC, Olzmann JA, Shaler TA, Sowa ME, Bennett EJ, Richter CM, Tyler RE, Greenblatt EJ, Harper JW, Kopito RR (2012). Defining human ERAD networks through an integrative mapping strategy. **Nat Cell Biol** 14(1): 93-105. doi: 10.1038/ncb2383
80. Okatsu K, Iemura S, Koyano F, Go E, Kimura M, Natsume T, Tanaka K, Matsuda N (2012). Mitochondrial hexokinase HK1 is a novel substrate of the Parkin ubiquitin ligase. **Biochem Biophys Res Commun** 428(1): 197-202. doi: 10.1016/j.bbrc.2012.10.041
81. Sun Y, Vashisht AA, Tchieu J, Wohlschlegel JA, Dreier L (2012). Voltage-dependent anion channels (VDACs) recruit Parkin to defective mitochondria to promote mitochondrial autophagy. **J Biol Chem** 287(48): 40652-40660. doi: 10.1074/jbc.M112.419721
82. Sarraf SA, Raman M, Guarani-Pereira V, Sowa ME, Huttlin EL, Gygi SP, Harper JW (2013). Landscape of the PARKIN-dependent ubiquitylome in response to mitochondrial depolarization. **Nature** 496(7445): 372-376. doi: 10.1038/nature12043



83. Ham SJ, Lee SY, Song S, Chung JR, Choi S, Chung J (2016). Interaction between RING1 (R1) and the Ubiquitin-like (UBL) Domains Is Critical for the Regulation of Parkin Activity. **J Biol Chem** 291(4): 1803-1816. doi: 10.1074/jbc.M115.687319
84. Danielsen JM, Sylvestersen KB, Bekker-Jensen S, Szklarczyk D, Poulsen JW, Horn H, Jensen LJ, Mailand N, Nielsen ML (2011). Mass spectrometric analysis of lysine ubiquitylation reveals promiscuity at site level. **Mol Cell Proteomics** 10(3): M110 003590. doi: 10.1074/mcp.M110.003590
85. Matsumoto M, Hatakeyama S, Oyamada K, Oda Y, Nishimura T, Nakayama KI (2005). Large-scale analysis of the human ubiquitin-related proteome. **Proteomics** 5(16): 4145-4151. doi: 10.1002/pmic.200401280
86. Wagner SA, Beli P, Weinert BT, Nielsen ML, Cox J, Mann M, Choudhary C (2011). A proteome-wide, quantitative survey of in vivo ubiquitylation sites reveals widespread regulatory roles. **Mol Cell Proteomics** 10(10): M111 013284. doi: 10.1074/mcp.M111.013284
87. Kim W, Bennett EJ, Huttlin EL, Guo A, Li J, Possemato A, Sowa ME, Rad R, Rush J, Comb MJ, Harper JW, Gygi SP (2011). Systematic and quantitative assessment of the ubiquitin-modified proteome. **Mol Cell** 44(2): 325-340. doi: 10.1016/j.molcel.2011.08.025
88. Greco TM, Yu F, Guise AJ, Cristea IM (2011). Nuclear import of histone deacetylase 5 by requisite nuclear localization signal phosphorylation. **Mol Cell Proteomics** 10(2): M110 004317. doi: 10.1074/mcp.M110.004317
89. Woods NT, Mesquita RD, Sweet M, Carvalho MA, Li X, Liu Y, Nguyen H, Thomas CE, Iversen ES, Jr., Marsillac S, Karchin R, Koomen J, Monteiro AN (2012). Charting the landscape of tandem BRCT domain-mediated protein interactions. **Sci Signal** 5(242): rs6. doi: 10.1126/scisignal.2002255
90. Lambert JP, Tucholska M, Go C, Knight JD, Gingras AC (2015). Proximity biotinylation and affinity purification are complementary approaches for the interactome mapping of chromatin-associated protein complexes. **J Proteomics** 118:81-94. doi: 10.1016/j.jprot.2014.09.011
91. Tsai YC, Greco TM, Boonmee A, Miteva Y, Cristea IM (2012). Functional proteomics establishes the interaction of SIRT7 with chromatin remodeling complexes and expands its role in regulation of RNA polymerase I transcription. **Mol Cell Proteomics** 11(5): 60-76. doi: 10.1074/mcp.A111.015156
92. Kim MS, Machida Y, Vashisht AA, Wohlschlegel JA, Pang YP, Machida YJ (2013). Regulation of error-prone translesion synthesis by Spartan/C1orf124. **Nucleic Acids Res** 41(3): 1661-1668. doi: 10.1093/nar/gks1267
93. Elzi DJ, Song M, Hakala K, Weintraub ST, Shiiro Y (2014). Proteomic Analysis of the EWS-Fli-1 Interactome Reveals the Role of the Lysosome in EWS-Fli-1 Turnover. **J Proteome Res** 13(8): 3783-3791. doi: 10.1021/pr500387m
94. Ermdal KB, Pedersen AK, Bekker-Jensen DB, Tsafou KP, Horn H, Lindner S, Schulte JH, Eggert A, Jensen LJ, Francavilla C, Olsen JV (2015). Temporal proteomics of NGF-TrkA signaling identifies an inhibitory role for the E3 ligase Cbl-b in neuroblastoma cell differentiation. **Sci Signal** 8(374): ra40. doi: 10.1126/scisignal.2005769
95. Mitra A, Basak T, Datta K, Naskar S, Sengupta S, Sarkar S (2013). Role of alpha-crystallin B as a regulatory switch in modulating cardiomyocyte apoptosis by mitochondria or endoplasmic reticulum during cardiac hypertrophy and myocardial infarction. **Cell death & disease** 4:e582. doi: 10.1038/cddis.2013.114
96. Guo D, Han J, Adam BL, Colburn NH, Wang MH, Dong Z, Eizirik DL, She JX, Wang CY (2005). Proteomic analysis of SUMO4 substrates in HEK293 cells under serum starvation-induced stress. **Biochem Biophys Res Commun** 337(4): 1308-1318. doi: 10.1016/j.bbrc.2005.09.191
97. Smilansky A, Dangoor L, Nakdimon I, Ben-Hail D, Mizrahi D, Shoshan-Barmatz V (2015). The Voltage-dependent Anion Channel 1 Mediates Amyloid beta Toxicity and Represents a Potential Target for Alzheimer Disease Therapy. **J Biol Chem** 290(52): 30670-30683. doi: 10.1074/jbc.M115.691493
98. Jager S, Cimermancic P, Gulbahce N, Johnson JR, McGovern KE, Clarke SC, Shales M, Mercenne G, Pache L, Li K, Hernandez H, Jang GM, Roth SL, Akiva E, Marlett J, Stephens M, D'Orso I, Fernandes J, Fahey M, Mahon C, O'Donoghue AJ, Todorovic A, Morris JH, Maltby DA, Alber T, Cagney G, Bushman FD, Young JA, Chanda SK, Sundquist WI, et al. (2012). Global landscape of HIV-human protein complexes. **Nature** 481(7381): 365-370. doi: 10.1038/nature10719
99. Garg A, O'Rourke J, Long C, Doering J, Ravenscroft G, Bezprozvannaya S, Nelson BR, Beetz N, Li L, Chen S, Laing NG, Grange RW, Bassel-Duby R, Olson EN (2014). KLHL40 deficiency destabilizes thin filament proteins and promotes nemaline myopathy. **J Clin Invest** 124(8): 3529-3539. doi: 10.1172/JCI74994
100. McFarland MA, Ellis CE, Markey SP, Nussbaum RL (2008). Proteomics analysis identifies phosphorylation-dependent alpha-synuclein protein interactions. **Mol Cell Proteomics** 7(11): 2123-2137. doi: 10.1074/mcp.M800116-MCP200
101. Aghazadeh Y, Martinez-Arguelles DB, Fan J, Culty M, Papadopoulos V (2014). Induction of androgen formation in the male by a TAT-VDAC1 fusion peptide blocking 14-3-3ε protein adaptor and mitochondrial VDAC1 interactions. **Mol Ther** 22(10): 1779-91. doi: 10.1038/mt.2014.116
